# Supplementary material
Source: publisher figshare collection journal article supplement (https://acs.figshare.com/ndownloader/files/4793707)
Supplement: Supplementary file 1 [file 4793707]

# **Low Cytotoxicity and Genotoxicity of Two-Dimensional MoS<sub>2</sub> and WS<sub>2</sub>**

Jennie H. Appel<sup>1</sup>, Duo O. Li<sup>2</sup>, Joshua D. Podlevsky<sup>3</sup>, Abhishek Debnath<sup>3,4</sup>, Alexander A. Green<sup>3,4</sup>, Qing

Hua Wang<sup>2</sup>, Junseok Chae\*<sup>1</sup>

Four Pages

Five Supplemental Figures

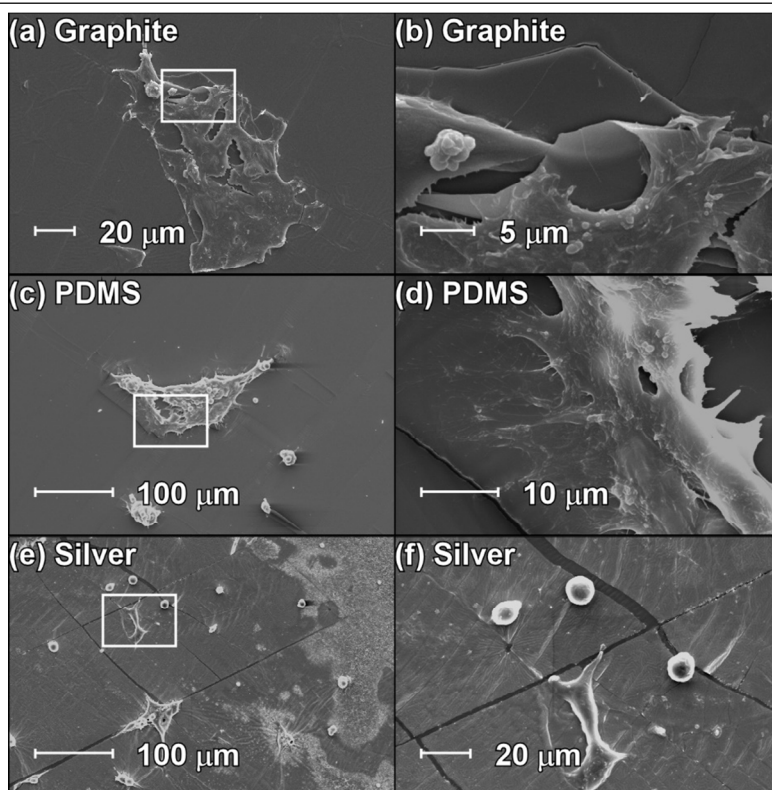

Supplemental Figure 1: Scanning Electron Microscopic images of control materials showing healthy cell morphology in the cases of graphite and PDMS and poor cell morphology in the case of silver. (a) and (b) HEK293f cells adhere to graphite flakes, (c) and (d) HEK293f cells adhere to PDMS substrate, (e) and (f) HEK293f cells adhere to sputtered silver substrate.

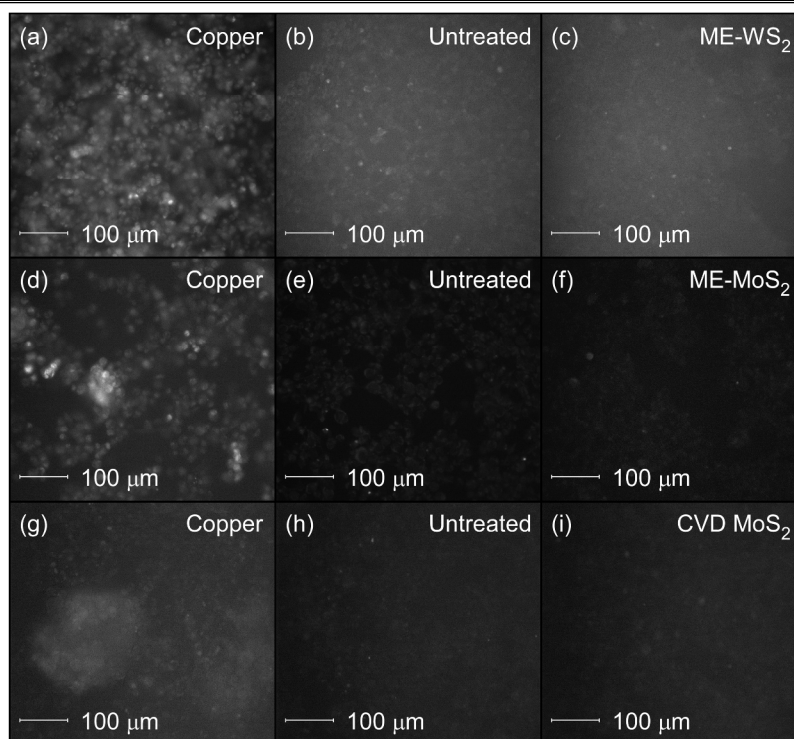

Supplemental Figure 2: Fluorescent images of HEK293f after exposure to various materials, (a, d, g) positive ROS inducing copper, (b, e, h) untreated cells, (c) ME-WS<sub>2</sub>, (f) ME-MoS<sub>2</sub>, and (i) CVD-MoS<sub>2</sub>

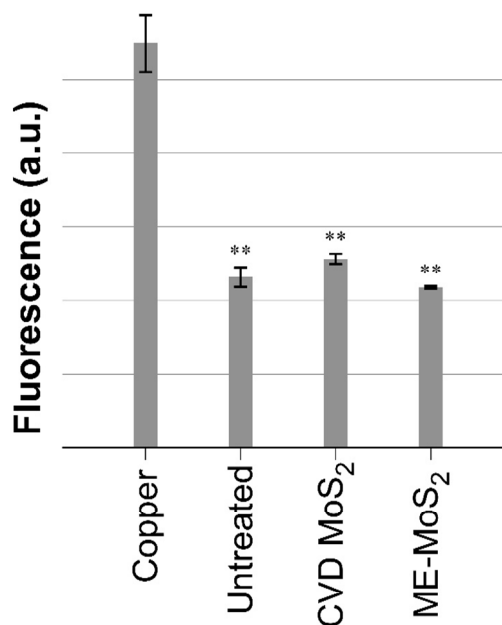

Supplemental Figure 3: Fluorescence intensity plots measuring reactive oxygen species (ROS) generation for various TMD flakes/sheets, a copper positive control, and an untreated negative control. TMD flakes/sheets do not generate significant levels of ROS after 12 hours of exposure.

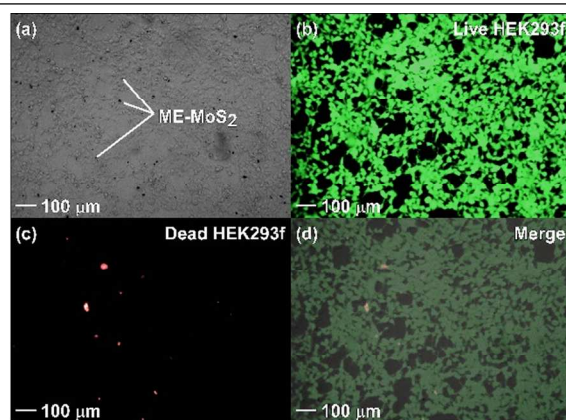

Supplemental Figure 4: Cellular viability assay showing fluorescence images of HEK293f cells in direct contact with particulates of ME-MoS<sub>2</sub> (a) optical image of particulates in contact with HEK293f cells, (b) live cells stained with green fluorescent calcein AM, (c) dead cells stained with red fluorescent ethidium homodimer-1 and (d) merge of (a), (b) & (c) showing the overall viability of cells exposed to particulates of ME-MoS<sub>2</sub>

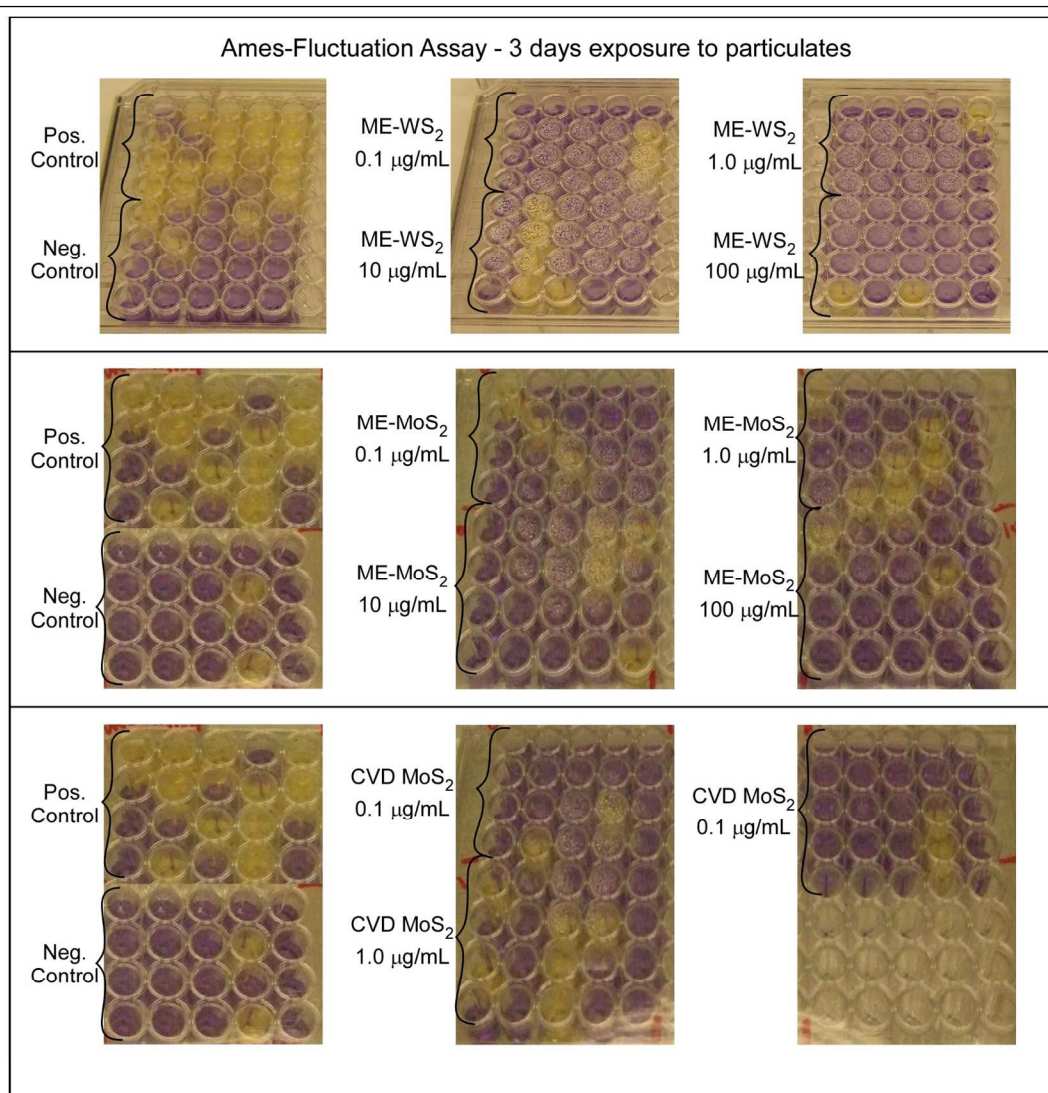

Supplemental Figure 5: Ames-Fluctuation assay after exposure to controls and various concentrations of ME-WS<sub>2</sub>, ME-MoS<sub>2</sub> and CVD-MoS<sub>2</sub> showing that TMD particulates are non-mutagenic towards *S. typhimurium* TA100.
